# Supplementary material for: Isostructural molecular strings linked via conserved dipolar (ether) O⋯CO short contacts in conformational polymorphs of racemic 2,4-di-O-acetyl-6-O-tosyl-myo-inositol 1,3,5-orthoesters
Source: Royal Society of Chemistry journal article supplement (doi:10.1039/b818888b), 2009-01-01
Supplement: b818888b.pdf [file b818888b.pdf]

## Isostructural Molecular Strings Linked *via* Conserved Dipolar (ether) O...C=O Short Contacts in Conformational Polymorphs of Racemic 2,4-Di-*O*-Acetyl-6-*O*-Tosyl-*myo*-Inositol 1,3,5-Orthoesters

K. Manoj,<sup>a,b</sup> Rajesh G. Gonnade,<sup>a</sup> Mohan M. Bhadbhade<sup>\*a</sup> and Mysore S. Shashidhar<sup>\*b</sup>

<sup>a</sup> Center for Materials Characterization, National Chemical Laboratory, Pune, India.

Fax: 91-20-25902642; Tel: 91-20-25902290; E-mail: m.bhadbhade@unsw.edu.au

<sup>b</sup> Organic Chemistry Division, National Chemical Laboratory, Pune, India.

Fax: 91-20-25902624; Tel: 91-20-25902055; E-mail: ms.shashidhar@ncl.res.in

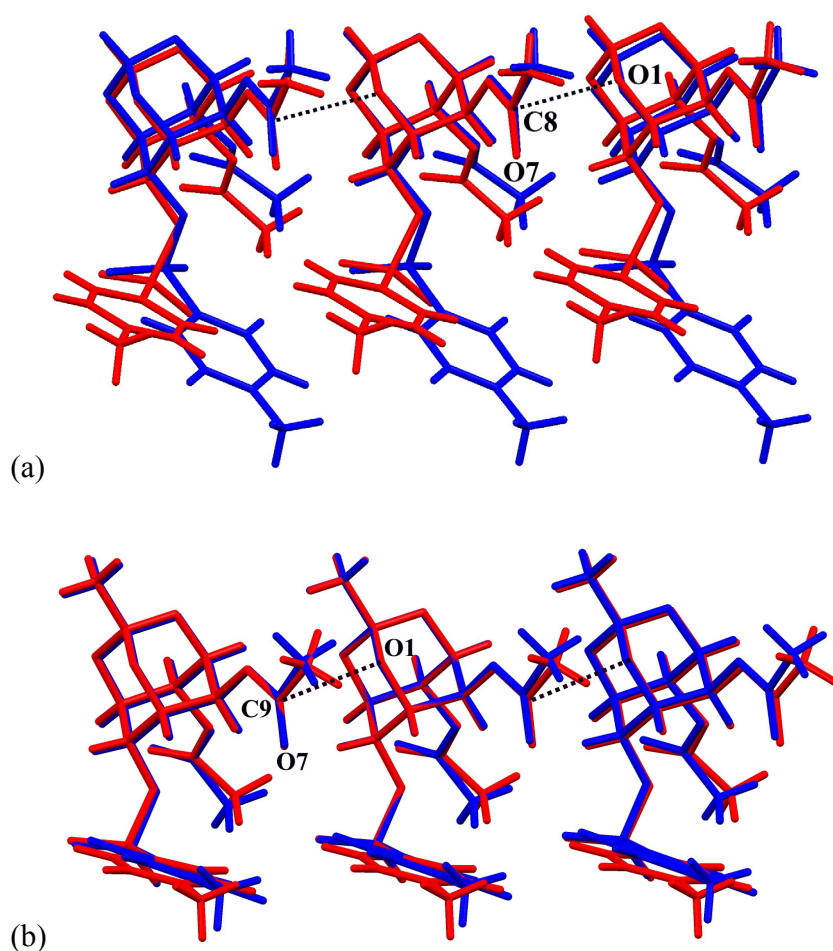

**Figure S1:** Molecular overlap figure of (a) dimorphs of **1** and (b) dimorphs of **2** [red: Form I; blue: Form II].

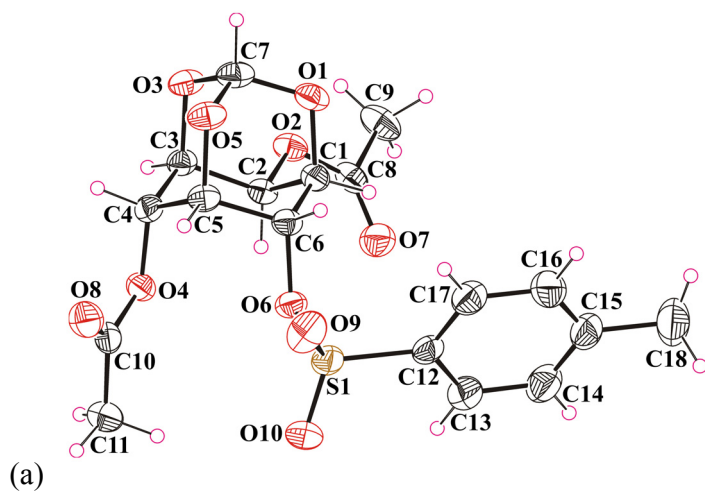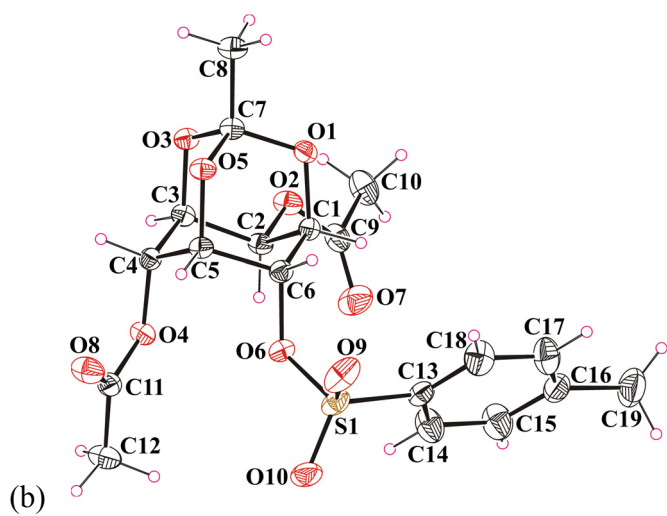

**Figure S2:** ORTEP of Form I crystals of (a) **1** and (b) **2**.
